# Supplementary material for: A Comparison of the Cheater Detection and the Unrelated Question Models: A Randomized Response Survey on Physical and Cognitive Doping in Recreational Triathletes
Source: PubMed Central journal article supplement (PMC4878800; doi:10.1371/journal.pone.0155765), 2016-05-24
Supplement: pone.0155765.s002.pdf [file pone.0155765.s002.pdf]

| <b>Number</b> | <b>Variable</b>    | <b>Definition, Coding</b>                                              |
|---------------|--------------------|------------------------------------------------------------------------|
| 01            | LikertSumCM        | Competition motivation score<br>Possible range: 10-70 (Likert sum)     |
| 02            | AnswerRRTCognitive | Answer to RRT procedure concerning cognitive doping<br>0: no<br>1: yes |
| 03            | AnswerRRTPhysical  | Answer to RRT procedure concerning physical doping<br>0: no<br>1: yes  |
| 04            | Gender             | Gender<br>0: male<br>1: female                                         |
| 05            | Age                | Age (years)                                                            |
| 06            | BodyHeight         | Body height (cm)                                                       |
| 07            | BodyWeight         | Body weight (cm)                                                       |
| 08            | YearsTraining      | Years of training experience (years)                                   |
| 09            | HoursTrainingWeek  | Hours of training/week (hours)                                         |
| 10            | ALevels            | A-levels<br>0: no<br>1: yes                                            |
| 11            | KmTrainingSwimming | Training kilometers/week (km), swimming                                |
| 12            | KmTrainingBiking   | Training kilometers/week (km), biking                                  |
| 13            | KmTrainingRunning  | Training kilometers/week (km), running                                 |
| 14            | GroupTraining      | Athlete mainly trains in training group<br>0: no<br>1: yes             |

| Number | Variable              | Definition, Coding                                                                                                                                                                                            |
|--------|-----------------------|---------------------------------------------------------------------------------------------------------------------------------------------------------------------------------------------------------------|
| 15     | SoloAthlete           | Athlete participates in the triathlon event as a solo athlete<br><br>0: no (athlete is a member of a relay team)<br>1: yes                                                                                    |
| 16     | Location              | Location of triathlon event<br><br>0: Frankfurt<br>1: Wiesbaden                                                                                                                                               |
| 17     | LanguageQuestionnaire | Language of questionnaire (selected by athlete)<br><br>0: German<br>1: Englisch                                                                                                                               |
| 18     | RRTModel              | RRT model<br><br>0: Cheater Detection Model (CDM)<br>1: Unrelated Question Model (UQM)                                                                                                                        |
| 19     | ProbSensQuestCog      | Probability to be directed to the sensitive question about cognitive doping<br><br>0: 0.25 (only CDM)<br>1: 0.75 (only CDM)<br>3: 0.67 (only UQM)                                                             |
| 20     | ProbSensQuestPhys     | Probability to be directed to the sensitive question about physical doping<br><br>0: 0.25 (only CDM)<br>1: 0.75 (only CDM)<br>3: 0.67 (only UQM)                                                              |
| 21     | RRTOrder              | Order of RRT procedures<br><br>0: cognitive doping first, physical doping second<br>1: physical doping first, cognitive doping second                                                                         |
| 22     | CaseExcluded          | Case excluded from final data analysis<br><br>0: no (case included in final data analysis)<br>1: yes, because of missing data<br>2: yes, because of outlier rejection<br>3: yes, because of visual inspection |
| 23     | CompMotiv             | Competition motivation score above the median (separately for Frankfurt-CDM, Wiesbaden-CDM, and Wiesbaden-UQM; only included cases)<br><br>0: no (lowly competitive)<br>1: yes (highly competitive)           |
| 24     | BodyMassIndex         | Body mass index (kg/m <sup>2</sup> ; only included cases)                                                                                                                                                     |
